# Supplementary material for: Selective Synthesis of 3-O-Palmitoyl-Silybin, a New-to-Nature Flavonolignan with Increased Protective Action against Oxidative Damages in Lipophilic Media
Source: PubMed Central journal article supplement (PMC6222644; doi:10.3390/molecules23102594), 2018-10-10
Supplement: molecules-23-02594-s001.pdf [file molecules-23-02594-s001.pdf]

1 Supplementary Materials

2 **Synthesis of 3-O-palmitoyl-silybin, a new-to-nature**  
3 **antioxidant flavonolignan with increased protective**  
4 **action against oxidative damages in lipophilic media**

5 Samantha Drouet<sup>12§</sup>, Joël Doussot<sup>123§</sup>, Laurine Garros<sup>124</sup>, David Mathiron<sup>5</sup>, Solène Bassard<sup>6</sup>, Alain  
6 Favre-Réguillon<sup>7</sup>, Roland Molinié<sup>6</sup>, Éric Lainé<sup>12\*</sup>, Christophe Hano<sup>12\*</sup>

7 <sup>1</sup> Laboratoire de Biologie des Ligneux et des Grandes Cultures, INRA USC1328, Université d'Orléans, 45067  
8 Orléans, France; [samantha.drouet@univ-orleans.fr](mailto:samantha.drouet@univ-orleans.fr); [laurine.garros@univ-orleans.fr](mailto:laurine.garros@univ-orleans.fr); [eric.laine@univ-](mailto:eric.laine@univ-orleans.fr)  
9 [orleans.fr](mailto:christophe.hano@univ-orleans.fr); [christophe.hano@univ-orleans.fr](mailto:christophe.hano@univ-orleans.fr)

10 <sup>2</sup> Bioactifs et Cosmétiques, GDR 3711 COSMACTIFS, CNRS/Université d'Orléans, 45067 Orléans CÉDEX 2,  
11 France

12 <sup>3</sup> Ecole Sciences industrielles et technologiques de l'information (SITI), Département Chimie Alimentation  
13 Santé Environnement Risque (CASER), Le CNAM 75141 Paris Cedex 03, France; [joel.doussot@lecnam.net](mailto:joel.doussot@lecnam.net)

14 <sup>4</sup> Institut de Chimie Organique et Analytique, ICOA UMR7311, Université d'Orléans-CNRS,  
15 45067 Orléans CÉDEX 2, France

16 <sup>5</sup> Plateforme Analytique, Institut de Chimie de Picardie FR 3085 CNRS, Université de Picardie Jules Verne, 33  
17 rue St Leu 80039 Amiens, France; [david.mathiron@u-picardie.fr](mailto:david.mathiron@u-picardie.fr)

18 <sup>6</sup> BIOPI EA3900, Biologie des Plantes et Innovation, Université de Picardie Jules Verne, 80037 Amiens, France;  
19 [solene.bassard@u-picardie.fr](mailto:solene.bassard@u-picardie.fr); [roland.molinie@u-picardie.fr](mailto:roland.molinie@u-picardie.fr)

20 <sup>7</sup> Université de Lyon, Laboratoire de Génie des Procédés Catalytiques (UMR 5285), CPE Lyon, 43 boulevard  
21 du 11 Novembre 1918, 69100 Villeurbanne, France; [alain.favre-reguillon@lgpc.cpe.fr](mailto:alain.favre-reguillon@lgpc.cpe.fr)

22

23 § These two authors contributed equally to this work and should be considered both as first authors

24 \* Correspondence: [christophe.hano@univ-orleans.fr](mailto:christophe.hano@univ-orleans.fr); Tel.: +33 237 309 753

25

26

27 **Table S1.** *in silico* evaluation of Log K<sub>ow</sub>

28 **Figure S1.** Proposed fragmentation pathway based on MS/MS of [M-H]<sup>-</sup> ion at m/z 719 corresponding  
29 to compound 2

30 **Figure S2.** <sup>1</sup>H NMR spectrum of 3-O-palmitoylsilybin 2 (600 MHz, DMSO-d<sub>6</sub>, 300K)

31 **Figure S3.** Partial <sup>1</sup>H NMR spectrum of silybin (a) and 3-O-palmitoylsilybin (b) (600 MHz, DMSO-d<sub>6</sub>,  
32 300K)

33 **Figure S4.** Partial HSQC spectrum of 3-O-palmitoylsilybin (2) (600 MHz, DMSO-d<sub>6</sub>, 300K)

34 **Figure S5.** Partial HMBC spectrum of 3-O-palmitoylsilybin (2) with H3/C1' long range correlation  
35 highlighted by the red box (600 MHz, DMSO-d<sub>6</sub>, 300K)

36 **Figure S6.** <sup>13</sup>C NMR (DEPTQ) spectrum of 3-O-palmitoylsilybin 2 (150 MHz, DMSO-d<sub>6</sub>, 300K)

37 **Figure S7.** Pearson correlation analysis linking Log K<sub>ow</sub> to CUPRAC assay, FRAP assay and CD  
38 production inhibition in bulk oil and o/w emulsion

39

**Table S1.** *in silico* evaluation of Log K<sub>ow</sub>

|                     | Log K <sub>ow</sub> * |
|---------------------|-----------------------|
| Silybin             | 2.58 ± 0.59           |
| Silybinyl palmitate | 10.72 ± 0.60          |
| Ascorbic acid       | -2.41 ± 0.45          |
| Ascorbyl palmitate  | 6.06 ± 0.59           |

40

\* evaluated *in silico* using ACD/LogP DB; Note that according to PubChem, Log K<sub>ow</sub> for BHA is equal to 3.06

41

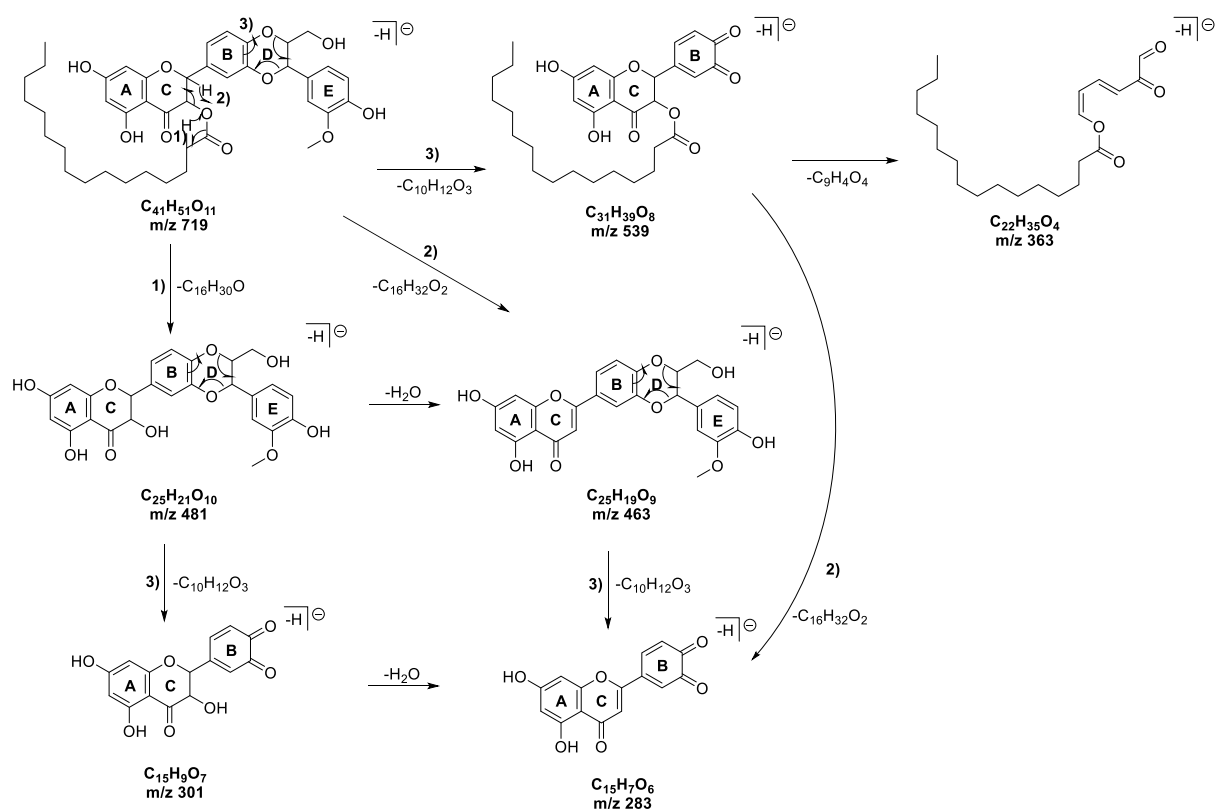

42

43

44

45

46

**Figure S1.** Proposed fragmentation pathway based on MS/MS of  $[M-H]^-$  ion at  $m/z$  719 corresponding to compound 2

47

48

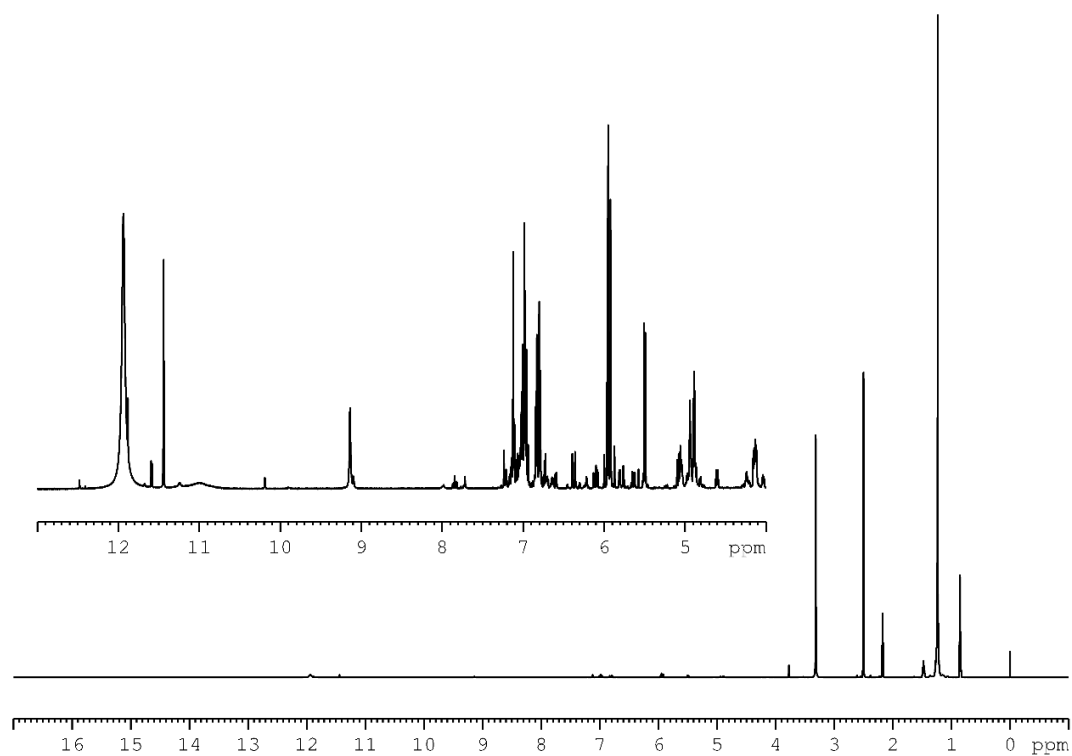

49

50

51

**Figure S2.**  $^1\text{H}$  NMR spectrum of 3-O-palmitoylsilybin 2 (600 MHz,  $\text{DMSO-d}_6$ , 300K)

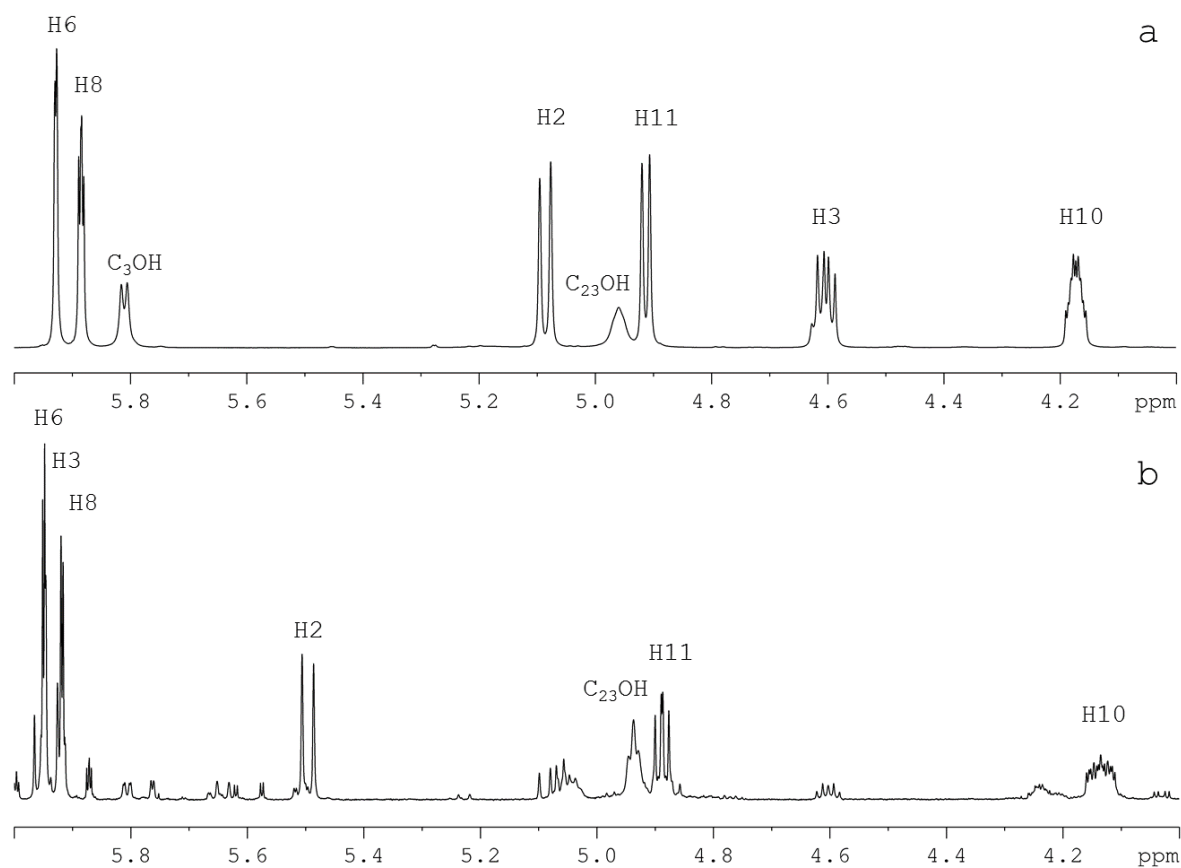

52

53 **Figure S3.** Partial  $^1\text{H}$  NMR spectrum of silybin (a) and 3-O-palmitoysilybin (b) (600 MHz,  $\text{DMSO-d}_6$ , 300K)

54

55

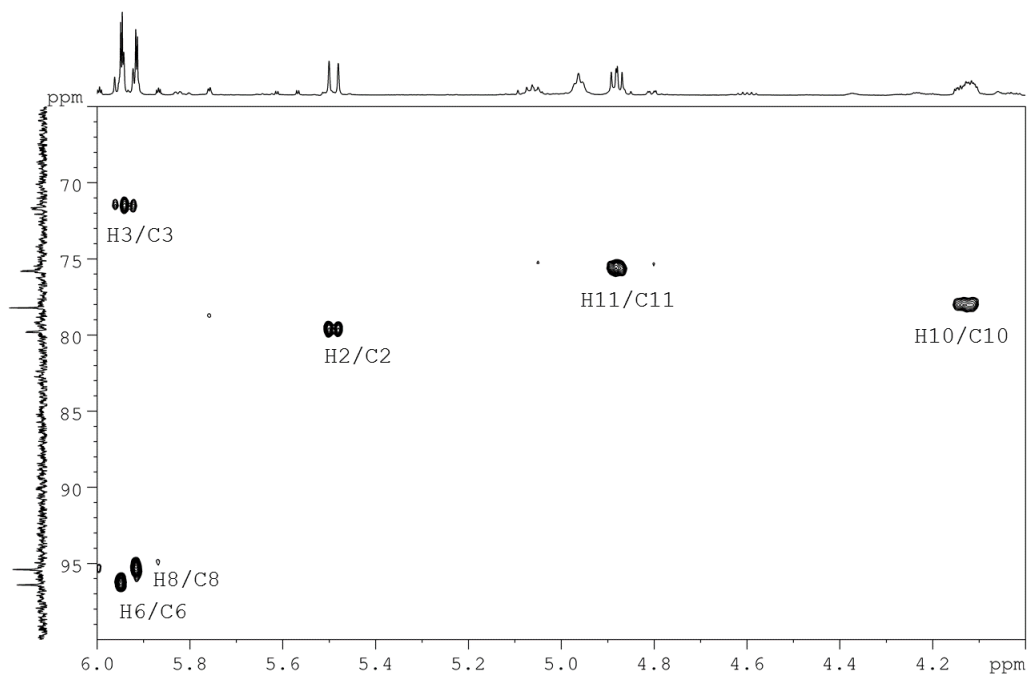

56

57

58

**Figure S4.** Partial HSQC spectrum of 3-O-palmitoylsilybin (2) (600 MHz, DMSO-d<sub>6</sub>, 300K)

59

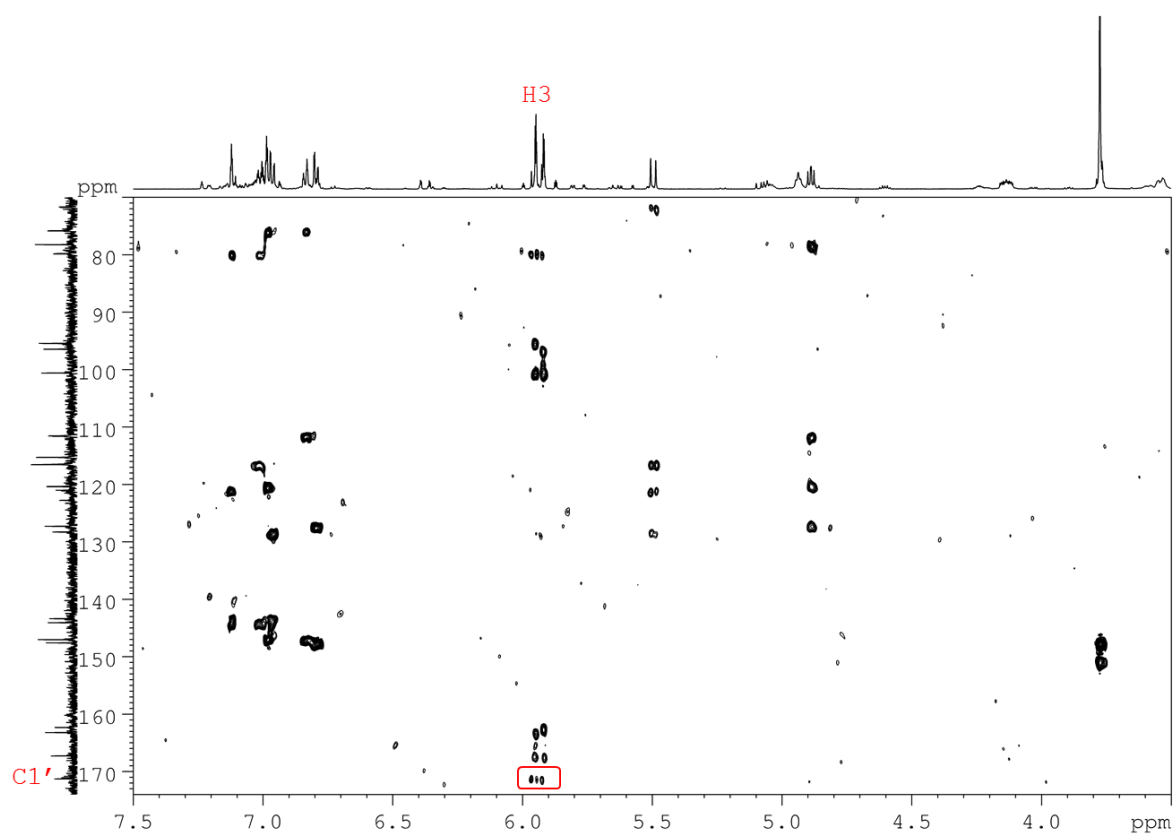

60  
61  
62  
63

**Figure S5.** Partial HMBC spectrum of 3-O-palmitoylsilybin (**2**) with H3/C1' long range correlation highlighted by the red box (600 MHz, DMSO-d<sub>6</sub>, 300K)

64

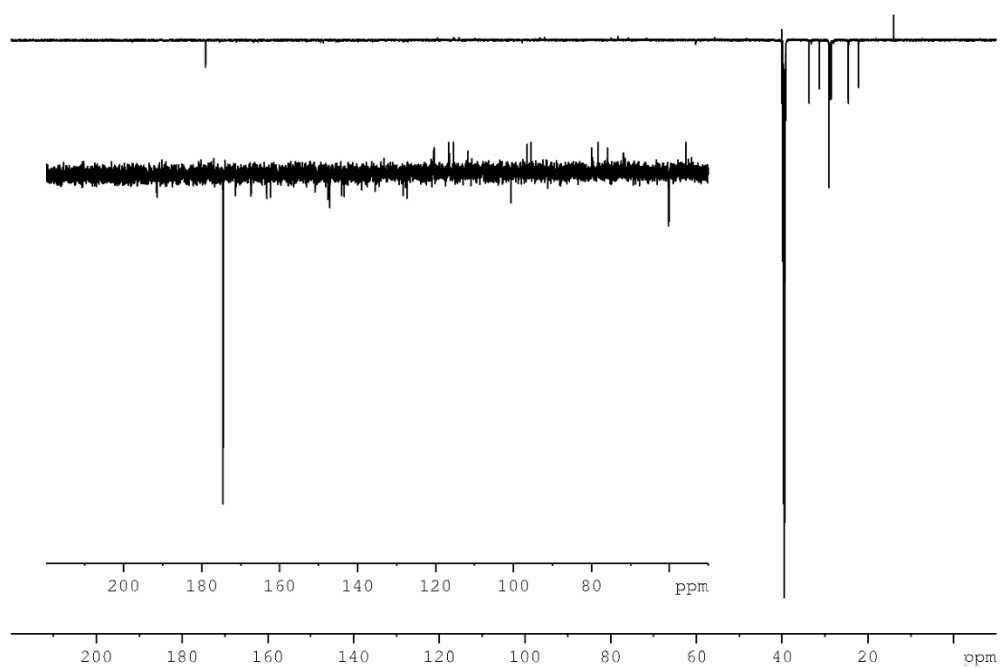

65

66

**Figure S6.**  $^{13}\text{C}$  NMR (DEPTQ) spectrum of 3-O-palmitoylsilybin 2 (150 MHz,  $\text{DMSO-d}_6$ , 300K)



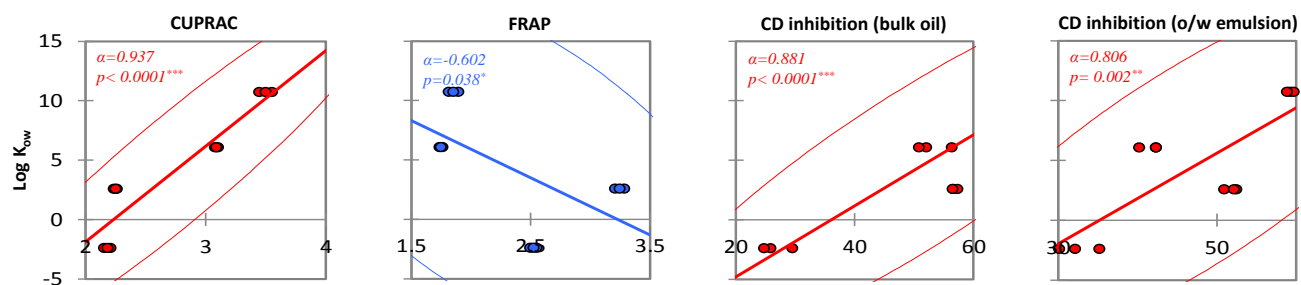

67  
68  
69  
70  
71

**Figure S7.** Pearson correlation analysis linking Log  $K_{ow}$  to CUPRAC and FRAP assays, and CD production inhibition in bulk oil and o/w emulsion

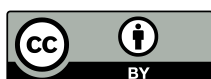

© 2018 by the authors. Submitted for possible open access publication under the terms and conditions of the Creative Commons Attribution (CC BY) license

74 (<http://creativecommons.org/licenses/by/4.0/>).
